# Supplementary material
Source: PubMed Central journal article supplement (PMC4818189)
Supplement: NIHMS750305-supplement-Supl.pdf [file NIHMS750305-supplement-Supl.pdf]

Supplementary Table 1: Characteristics of study participants at study entry, stratified by reduced, preserved, or recovered left ventricular ejection fraction; summaries presented as n (%) unless otherwise noted as median (interquartile range).

|                                         | Reduced LVEF<br>n = 1141 | Preserved LVEF<br>n = 106 | Recovered LVEF<br>n = 138 |
|-----------------------------------------|--------------------------|---------------------------|---------------------------|
| <i>Demographic characteristics</i>      |                          |                           |                           |
| Age, years, median (IQR)                | 57 (47, 65)              | 61 (51, 72)               | 57 (51, 66)               |
| Male sex                                | 801 (70.2)               | 50 (47.2)                 | 70 (50.7)                 |
| Race                                    |                          |                           |                           |
| Caucasian                               | 846 (74.1)               | 70 (66.0)                 | 113 (81.9)                |
| African American                        | 249 (21.8)               | 33 (31.1)                 | 24 (17.4)                 |
| Other                                   | 46 (4.0)                 | 3 (2.8)                   | 1 (0.7)                   |
| <i>Medical history and risk factors</i> |                          |                           |                           |
| History of diabetes                     | 342 (30.0)               | 29 (27.4)                 | 37 (26.8)                 |
| History of hypertension                 | 664 (58.2)               | 70 (66.0)                 | 83 (60.1)                 |
| History of hyperlipidemia               | 728 (63.8)               | 66 (62.3)                 | 86 (62.3)                 |
| Tobacco use                             |                          |                           |                           |
| Current                                 | 115 (10.1)               | 5 (4.8)                   | 13 (9.6)                  |
| Former                                  | 620 (54.5)               | 56 (53.3)                 | 68 (50.0)                 |
| Never                                   | 403 (35.4)               | 44 (41.9)                 | 55 (40.4)                 |
| <i>Heart failure characteristics</i>    |                          |                           |                           |
| NYHA functional classification          |                          |                           |                           |
| I                                       | 168 (14.7)               | 27 (25.5)                 | 34 (24.6)                 |
| II                                      | 521 (45.7)               | 53 (50.0)                 | 70 (50.7)                 |
| III                                     | 361 (31.6)               | 21 (19.8)                 | 27 (19.6)                 |
| IV                                      | 91 (8.0)                 | 5 (4.7)                   | 7 (5.1)                   |
| Ischemic cardiomyopathy etiology        | 393 (34.4)               | 15 (14.2)                 | 23 (16.7)                 |
| Cardiac resynchronization therapy       | 338 (29.6)               | 4 (3.8)                   | 22 (15.9)                 |
| Defibrillator use                       | 557 (48.8)               | 8 (7.5)                   | 32 (23.2)                 |
| <i>Clinical measures, median (IQR)</i>  |                          |                           |                           |
| LVEF, %                                 | 25 (18, 35)              | 64 (60, 70)               | 55 (50, 60)               |
| Body mass index, kg/m <sup>2</sup>      | 28 (25, 33)              | 29 (25, 36)               | 29 (25, 34)               |

|                                              |                   |                   |                   |
|----------------------------------------------|-------------------|-------------------|-------------------|
| Systolic blood pressure, mmHg                | 110 (98, 123)     | 125 (111, 139)    | 117 (104, 130)    |
| Diastolic blood pressure, mmHg               | 70 (60, 78)       | 70 (62, 79)       | 70 (62, 78)       |
| Creatinine, mg/dL                            | 0.93 (0.77, 1.27) | 0.90 (0.77, 1.36) | 0.84 (0.71, 1.15) |
| Estimated GFR, mL/min/1.73 m <sup>2</sup>    | 67 (50, 84)       | 63 (48, 81)       | 71 (56, 83)       |
| <i>Medication use</i>                        |                   |                   |                   |
| ACE inhibitors or ARBs                       | 1036 (90.8)       | 64 (60.4)         | 115 (83.3)        |
| Aldosterone antagonists                      | 427 (37.4)        | 14 (13.2)         | 31 (22.5)         |
| Beta blockers                                | 1043 (91.4)       | 70 (66.0)         | 117 (84.8)        |
| Digoxin                                      | 509 (44.6)        | 5 (4.7)           | 36 (26.1)         |
| Hydralazine or nitrates                      | 203 (17.8)        | 14 (13.2)         | 21 (15.2)         |
| <i>Biomarkers, median (IQR)</i>              |                   |                   |                   |
| Galectin-3, ng/mL                            | 18.0 (13.4, 23.6) | 17.2 (13.6, 24.3) | 16.0 (13.4, 20.8) |
| High-sensitivity ST2, ng/mL                  | 27.3 (19.9, 40.8) | 27.5 (21.3, 37.9) | 26.0 (18.5, 36.6) |
| Troponin-I                                   |                   |                   |                   |
| Detectable, n (%)                            | 782 (68.5)        | 55 (51.9)         | 65 (47.1)         |
| Troponin-I, ng/mL, median (IQR) <sup>a</sup> | 0.02 (0.01, 0.04) | 0.01 (0.01, 0.04) | 0.01 (0.01, 0.03) |
| BNP, pg/mL                                   | 215 (67, 681)     | 84 (41, 240)      | 66 (25, 172)      |

IQR, interquartile range, presented as 25<sup>th</sup> and 75<sup>th</sup> percentile; LVEF, left ventricular ejection fraction; NYHA, New York Heart Association; GFR, glomerular filtration rate; ACE, angiotensin-converting enzyme; ARB, angiotensin receptor blocker; ST2, soluble toll-like receptor-2; BNP, B-type natriuretic peptide.

<sup>a</sup> Among those participants with a detectable troponin-I.
